# Supplementary material for: Ebola Virus GP Activates Endothelial Cells via Host Cytoskeletal Signaling Factors
Source: MDPI journal article supplement (doi:10.3390/v14010142), 2022-01-13
Supplement: s1 [file s1]

Supplementary Materials

# Ebola Virus GP Activates Endothelial Cells via Host Cytoskeletal Signaling Factors

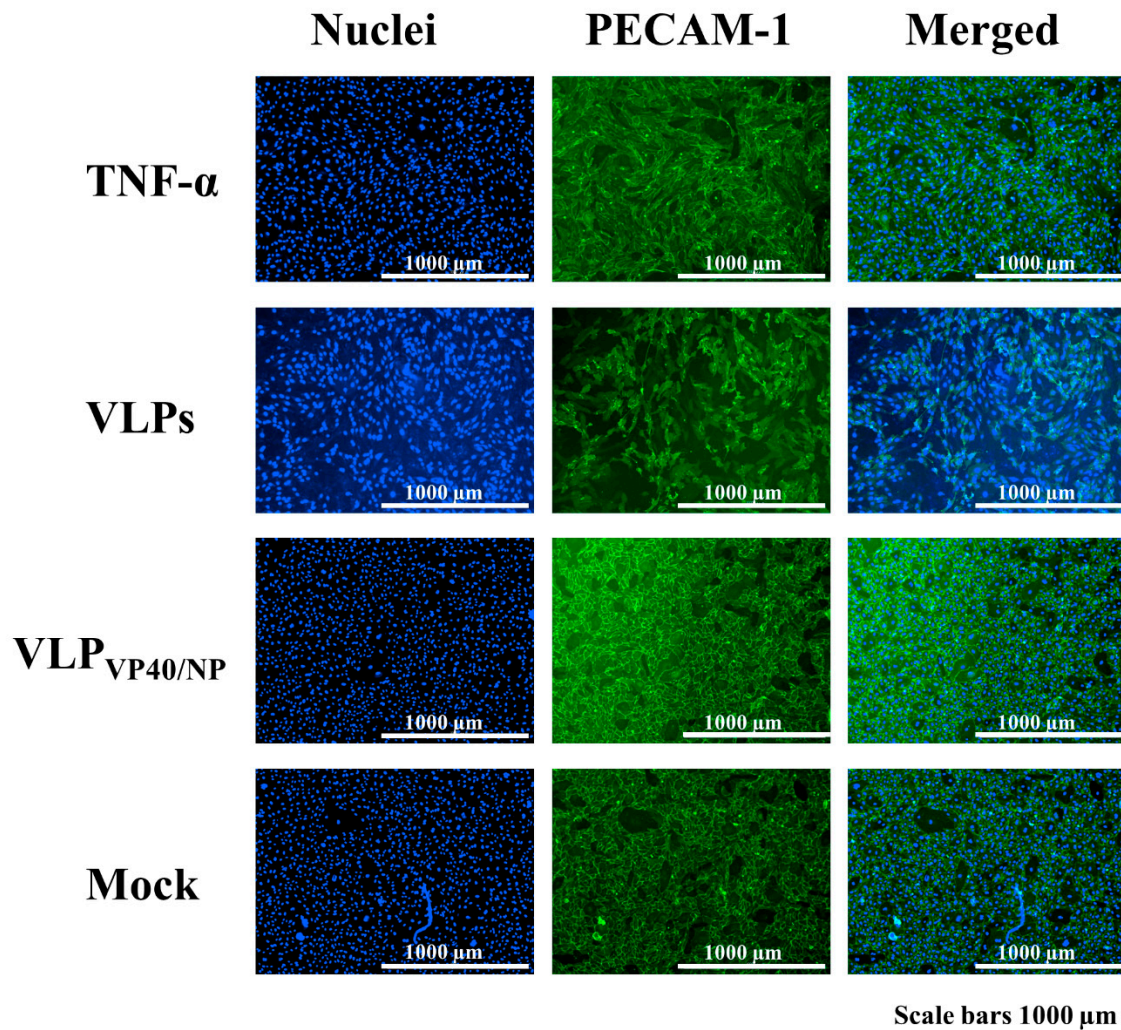

**Figure S1.** Platelet endothelial cell adhesion molecule 1 (PECAM-1) staining to confirm the integrity of the endothelial monolayer. Endothelial cells were exposed to Ebola Virus-like particles with GP (VLPs; 20 $\times$  dilution) or without GP (VLP<sub>VP40/NP</sub>; 20 $\times$  dilution) for 48 h. Following the treatment, cells were fixed and permeabilized, and the activation was detected by immunofluorescence analysis using a monoclonal antibody directed against PECAM-1. The cells were then stained with Hoechst 33358 for imaging (magnification,  $\times 10$ ). Human recombinant TNF- $\alpha$  and supernatants from non-transfected cells (mock) were used as the positive and negative controls, respectively. Only cells treated with VLPs showed different pattern and shape for the PECAM-1 staining. TNF- $\alpha$ , VLP<sub>VP40/NP</sub><sup>+</sup>, and Mock-treated ECs showed similar patterns, confirming the integrity of ECs.

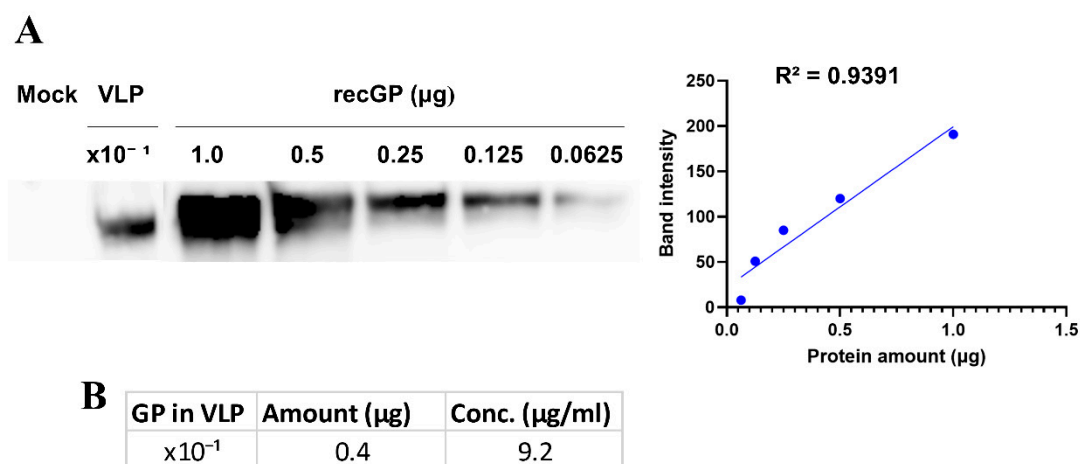

**Figure S2.** Quantification of Ebola GP contained in the produced Ebola Virus-like particles (VLPs). (A) Western blot was performed with 10× dilution of Ebola VLPs and serial dilutions of the commercial recombinant GP lacking the transmembrane region (reference). Anti-GP antibodies were used to detect and analyze GP. The resulting linear standard curve (right panel) of the reference was used for the estimation of the amount of GP contained in VLPs. (B) the amount of GP contained in 10× dilution of VLPs was deduced from the linear curve equation.

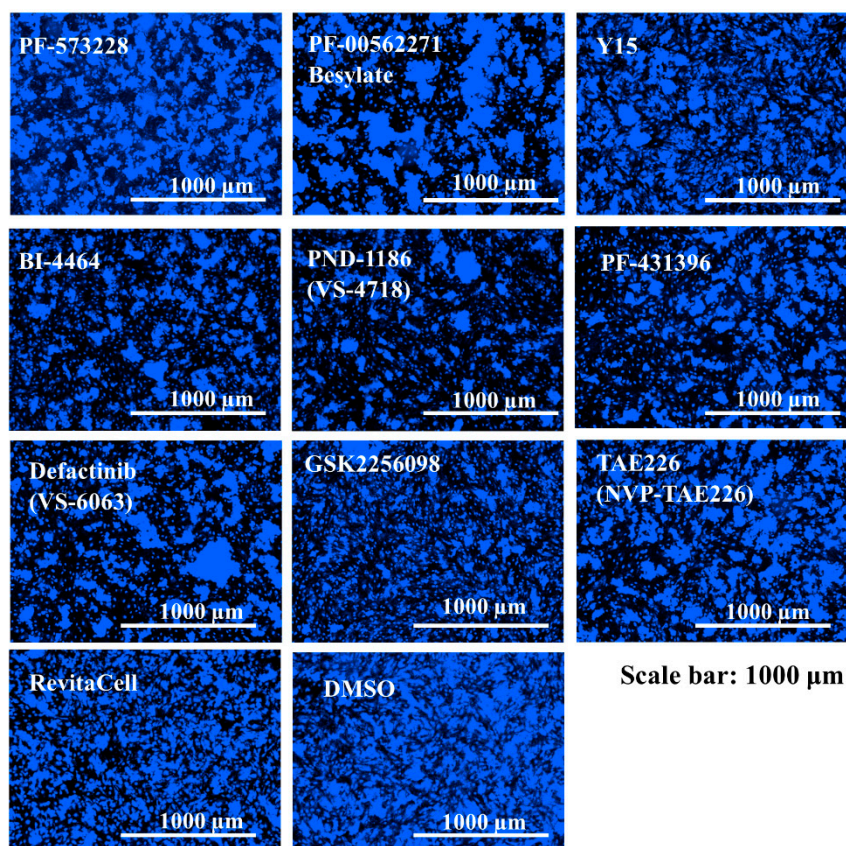

**Figure S3.** Nuclei staining of virus-like particles (VLPs)-treated endothelial cells in the presence of focal adhesion kinase (FAK) inhibitors. Endothelial cells in 96-well plates were treated with Ebola VLPs (10×) in the presence of FAK inhibitors (5 µM), with RevitaCell and DMSO used as the positive and negative controls, respectively. 48 hours post-treatment, the cells were analyzed by immunofluorescence for intercellular adhesion molecule 1 (data not shown) expression, and the nuclei (blue) were stained with Hoechst for the evaluation of the protective effect of FAK inhibitors against the VLPs-induced endothelial cells disruption.

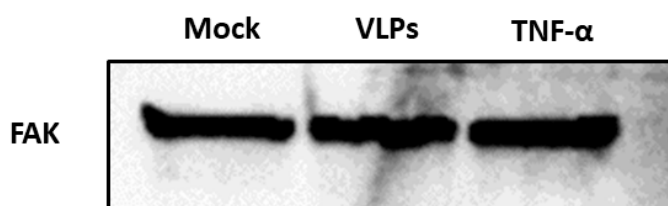

**Figure S4.** FAK detection in endothelial cells. Endothelial cells were treated with virus-like particle (10×) and TNF-α (10 ng/mL) for 48 h. Cell lysates were prepared and assessed for the level of focal adhesion kinase (FAK) expression using the rabbit monoclonal anti-FAK antibodies [(D507U)XP, Cell signaling, MA, USA; 1:1000]. Endothelial cells treated with the medium (Mock) were used as the control. No change in FAK level was observed upon the treatment with virus-like particles and TNF-α.

**Table S1.** Summary of cytoskeletal library screening for the inhibition of virus-like particles (VLPs)- and TNF-α-induced intercellular adhesion molecules 1 (ICAM-1) expression.

| Compound Name                | % of Inhibition of ICAM-1 Expression |       |                                |       |
|------------------------------|--------------------------------------|-------|--------------------------------|-------|
|                              | VLPs-Induced ICAM-1 (Average)        | +/-SD | TNF-α-Induced ICAM-1 (Average) | +/-SD |
| Imatinib Mesylate (STI571)   | -41.7                                | 12.6  | 3.3                            | 4.1   |
| Triciribine                  | -35.7                                | 4.0   | 9.6                            | 0.9   |
| ABT-751 (E7010)              | -41.1                                | 19.6  | 4.5                            | 9.7   |
| Ispinesib (SB-715992)        | -43.4                                | 1.0   | -7.6                           | 14.3  |
| SB743921 HCl                 | -64.6                                | 37.6  | -2.1                           | 8.0   |
| Quercetin                    | -33.0                                | 48.8  | 10.7                           | 0.6   |
| A-674563                     | 49.0                                 | 46.2  | 93.9                           | 5.5   |
| Ipatasertib (GDC-0068)       | -50.4                                | 43.5  | 2.4                            | 1.3   |
| Methyl Vanillate             | -104.1                               | 21.0  | 4.4                            | 3.9   |
| Vinorelbine Tartrate         | 45.2                                 | 29.4  | 34.2                           | 1.4   |
| Nilotinib (AMN-107)          | -50.1                                | 33.0  | 10.5                           | 4.5   |
| AT9283                       | 82.8                                 | 17.0  | 91.4                           | 2.8   |
| BIIB021                      | 74.8                                 | 9.7   | 32.8                           | 0.4   |
| Ponatinib (AP24534)          | 76.8                                 | 26.9  | 92.5                           | 0.2   |
| Lexibulin (CYT997)           | 10.3                                 | 27.7  | 23.8                           | 0.6   |
| Daphnetin                    | -0.3                                 | 17.1  | -1.4                           | 10.4  |
| PF-00562271 Besylate         | 79.9                                 | 23.1  | 87.5                           | 1.7   |
| TAE226 (NVP-TAE226)          | 49.8                                 | 17.5  | 23.8                           | 6.2   |
| 2-Methoxy-1,4-naphthoquinone | -87.7                                | 0.2   | 26.9                           | 38.5  |
| Vinblastine sulfate          | 52.9                                 | 20.8  | 41.8                           | 22.9  |
| Elesclomol (STA-4783)        | -24.8                                | 6.5   | -2.4                           | 6.0   |
| Tanespimycin (17-AAG)        | 73.1                                 | 14.3  | 30.2                           | 3.2   |
| XAV-939                      | -86.9                                | 16.6  | -8.3                           | 0.7   |
| PHT-427                      | -45.5                                | 7.8   | -10.2                          | 3.1   |

|                                                |        |      |       |      |
|------------------------------------------------|--------|------|-------|------|
| NVP-BHG712                                     | -7.4   | 6.8  | -0.4  | 0.6  |
| PP121                                          | 49.9   | 16.3 | 41.9  | 0.7  |
| KW-2478                                        | 58.9   | 29.0 | 18.4  | 15.6 |
| A-205804                                       | 54.7   | 4.6  | 33.3  | 11.5 |
| Lifitegrast                                    | -51.1  | 26.1 | 10.1  | 10.1 |
| i-Inositol                                     | -25.7  | 49.1 | -1.6  | 5.9  |
| Enzastaurin (LY317615)                         | -269.5 | 69.8 | -11.7 | 5.0  |
| Alvespimycin (17-DMAG) HCl                     | 63.2   | 8.5  | 22.9  | 7.1  |
| Vincristine sulfate                            | 21.7   | 6.8  | 24.7  | 2.1  |
| AT7867                                         | 23.2   | 5.6  | -27.3 | 12.5 |
| 4-Demethylepipodophyllotoxin(NSC-122819,VM-26) | -40.7  | 21.7 | 10.4  | 8.5  |
| Rebastinib (DCC-2036)                          | 86.4   | 4.3  | 88.3  | 5.4  |
| Geldanamycin                                   | 79.0   | 13.0 | 21.4  | 4.7  |
| PF-562271                                      | 72.9   | 23.0 | 64.9  | 0.3  |
| Decursinol angelate                            | -56.0  | 18.3 | -2.2  | 18.8 |
| Nilotinib hydrochloride                        | -26.8  | 15.4 | 4.0   | 1.8  |
| Luminespib (AUY-922, NVP-AUY922)               | 100.3  | 8.4  | 51.0  | 37.1 |
| Docetaxel                                      | -18.8  | 9.3  | 13.2  | 7.5  |
| Chelerythrine Chloride                         | -49.8  | 22.4 | 8.7   | 10.0 |
| Albendazole                                    | -62.5  | 12.0 | -11.0 | 5.8  |
| Colchicine                                     | 28.8   | 12.2 | 20.6  | 19.2 |
| CCT128930                                      | -29.7  | 22.9 | -15.5 | 34.6 |
| AZ 3146                                        | -71.8  | 16.1 | -16.7 | 8.9  |
| GNF-2                                          | -18.5  | 45.6 | -3.2  | 10.2 |
| Isoquercitrin                                  | -8.9   | 17.6 | -9.3  | 1.2  |
| Dasatinib hydrochloride                        | 95.6   | 5.8  | -1.0  | 14.7 |
| MK-2206 2HCl                                   | -24.0  | 18.9 | -3.9  | 11.4 |
| Paclitaxel                                     | -58.9  | 56.7 | -9.1  | 33.6 |
| Epothilone A                                   | -17.6  | 5.9  | -14.5 | 5.9  |
| Albendazole Oxide                              | -86.9  | 31.2 | -10.8 | 4.9  |
| Honokiol                                       | -39.5  | 49.7 | 23.2  | 50.2 |
| SNX-2112 (PF-04928473)                         | 51.3   | 2.9  | 15.7  | 33.4 |
| PF-04691502                                    | 44.3   | 23.0 | 64.9  | 7.2  |
| Go 6983                                        | -38.8  | 45.9 | -19.8 | 20.6 |
| Vindoline                                      | -14.7  | 9.9  | -13.3 | 15.9 |
| SC66                                           | 52.1   | 11.6 | 79.6  | 10.5 |
| H-Cys(Trt)-OH                                  | -28.5  | 3.6  | -7.2  | 14.8 |
| IWR-1-endo                                     | -25.0  | 2.7  | -2.5  | 23.6 |
| Mdivi-1                                        | -23.1  | 2.4  | -8.2  | 14.7 |
| IWP-L6                                         | -64.4  | 66.9 | -7.7  | 17.2 |
| MPI-0479605                                    | -59.8  | 32.3 | -8.5  | 20.7 |
| GNF-5                                          | -79.9  | 45.6 | -2.5  | 14.3 |
| TRx0237 (LMTX) mesylate                        | -106.8 | 13.7 | 3.3   | 12.6 |
| CP21R7 (CP21)                                  | 1.2    | 4.1  | 41.3  | 55.7 |
| Wnt agonist 1                                  | 46.7   | 19.1 | 10.6  | 8.5  |
| KYA1797K                                       | -3.2   | 13.2 | 5.3   | 15.9 |
| WAY-316606                                     | -0.6   | 13.4 | 3.6   | 11.5 |
| GSK923295                                      | -31.2  | 7.9  | -2.8  | 14.1 |
| Dyngo-4a                                       | -28.7  | 15.1 | -2.2  | 17.8 |
| CW069                                          | -78.7  | 97.7 | -4.9  | 17.7 |
| WIKI4                                          | -37.5  | 17.3 | -3.6  | 11.6 |

|                                              |        |       |       |      |
|----------------------------------------------|--------|-------|-------|------|
| SB273005                                     | 56.2   | 22.4  | 1.6   | 13.7 |
| Akti-1/2                                     | 2.5    | 24.0  | 0.0   | 17.5 |
| TIC10                                        | -8.0   | 6.7   | 21.2  | 0.1  |
| BAY 1217389                                  | -44.0  | 15.6  | 3.3   | 5.4  |
| Miransertib (ARQ 092) HCl                    | 59.8   | 9.8   | 15.0  | 19.2 |
| KHS101 hydrochloride                         | 32.8   | 2.3   | -0.5  | 12.2 |
| IPA-3                                        | -27.1  | 8.7   | -6.8  | 16.6 |
| GZD824 Dimesylate                            | 83.2   | 3.6   | 94.4  | 0.0  |
| CH5138303                                    | 82.2   | 14.0  | 17.8  | 8.0  |
| Uprosertib (GSK2141795)                      | 33.8   | 28.3  | 6.0   | 18.2 |
| AT13148                                      | 23.2   | 33.7  | -8.8  | 8.7  |
| Dasatinib Monohydrate                        | 58.7   | 13.7  | -6.8  | 10.3 |
| AZD5363                                      | -11.6  | 42.7  | -2.4  | 7.2  |
| IQ-1                                         | 22.2   | 29.6  | 9.5   | 1.7  |
| Apoptozole                                   | -40.9  | 6.2   | 4.2   | 8.7  |
| K 858                                        | -0.5   | 29.0  | -3.1  | 9.1  |
| PF-3758309                                   | 77.0   | 17.9  | 91.4  | 0.8  |
| Bisindolylmaleimide IX (Ro 31-8220 Mesylate) | 71.9   | 9.7   | 96.6  | 2.0  |
| ARQ 621                                      | -9.8   | 46.8  | -16.3 | 17.4 |
| INH1                                         | -178.7 | 239.4 | -6.9  | 8.0  |
| PF-431396                                    | 66.7   | 12.5  | 90.5  | 1.8  |
| Combretastatin A4                            | 24.7   | 10.9  | 0.5   | 8.5  |
| PU-H71                                       | 63.8   | 9.4   | 25.0  | 7.7  |
| PRI-724                                      | -55.3  | 28.3  | 26.2  | 4.0  |
| KRIBB11                                      | 28.4   | 9.5   | 38.1  | 4.4  |
| BI-4464                                      | 78.2   | 6.3   | 13.2  | 3.0  |
| KY02111                                      | -46.8  | 16.1  | -10.5 | 21.3 |
| Bisindolylmaleimide I (GF109203X)            | -60.1  | 33.4  | -11.5 | 19.2 |
| PF-562271 HCl                                | 70.1   | 24.5  | 93.7  | 6.5  |
| INH6                                         | -25.5  | 30.1  | 3.4   | 14.7 |
| PND-1186 (VS-4718)                           | 40.2   | 34.0  | 21.5  | 14.7 |
| Docetaxel Trihydrate                         | 16.7   | 3.0   | -1.8  | 18.2 |
| Dynasore                                     | -1.4   | 12.6  | 3.8   | 18.7 |
| HA15                                         | -56.7  | 18.9  | -5.2  | 17.6 |
| PNU-74654                                    | -13.6  | 27.4  | 6.7   | 5.6  |
| PKC-theta inhibitor                          | 30.0   | 3.6   | -3.9  | 15.0 |
| XL888                                        | 89.7   | 1.0   | 15.3  | 14.3 |
| PD173955                                     | 67.4   | 3.3   | -12.1 | 28.7 |
| VER-49009                                    | 68.4   | 4.0   | -4.3  | 15.4 |
| TAI-1                                        | -31.9  | 28.3  | -3.4  | 35.2 |
| Ruboxistaurin (LY333531 HCl)                 | -52.6  | 29.1  | -10.8 | 18.2 |
| FRAX486                                      | 66.9   | 14.9  | -9.3  | 21.1 |
| Deguelin                                     | -20.8  | 16.7  | -6.2  | 13.7 |
| TRC051384                                    | 53.2   | 11.7  | 12.7  | 13.1 |
| Monastrol                                    | -34.7  | 43.3  | -0.8  | 15.3 |
| LF3                                          | 17.9   | 11.3  | 1.7   | 2.6  |
| GSK2256098                                   | 27.5   | 4.1   | -3.5  | 2.5  |
| Asciminib (ABL001)                           | -33.6  | 3.6   | 2.9   | 1.8  |
| Tirofiban Hydrochloride                      | 3.7    | 0.1   | -3.8  | 1.4  |
| GNF-6231                                     | 5.2    | 14.1  | -0.3  | 8.6  |
| IWP-O1                                       | 5.3    | 18.5  | -5.0  | 1.2  |

|                                                    |       |      |       |      |
|----------------------------------------------------|-------|------|-------|------|
| iCRT3                                              | -8.5  | 6.3  | 2.1   | 8.9  |
| iCRT14                                             | 7.7   | 10.2 | -1.8  | 0.2  |
| Adavivint (SM04690)                                | -16.3 | 17.6 | 24.9  | 4.2  |
| SSE15206                                           | 6.1   | 15.9 | -0.4  | 1.9  |
| Ingenol                                            | 8.4   | 17.3 | 10.6  | 3.2  |
| Berbamine                                          | 41.9  | 7.3  | 3.7   | 7.4  |
| Triptonide                                         | 88.8  | 19.3 | 99.1  | 0.5  |
| Dasatinib                                          | 75.1  | 4.4  | -1.2  | 0.4  |
| GSK690693                                          | -3.6  | 25.1 | 1.3   | 3.9  |
| Onalespib (AT13387)                                | 81.9  | 15.3 | 18.6  | 2.8  |
| Bafetinib (INNO-406)                               | -12.7 | 29.8 | -4.4  | 7.9  |
| KW-2449                                            | -31.0 | 8.0  | 9.8   | 2.7  |
| ICG-001                                            | -13.9 | 8.1  | 28.3  | 5.4  |
| Sotrastaurin                                       | -53.6 | 6.5  | -15.2 | 5.4  |
| Berbamine (dihydrochloride)                        | 43.2  | 14.7 | -1.8  | 3.8  |
| Triclabendazole                                    | 8.6   | 15.6 | -2.8  | 2.7  |
| Danuserib (PHA-739358)                             | 71.3  | 0.8  | 39.2  | 1.1  |
| Ganetespib (STA-9090)                              | 84.8  | 0.0  | 20.5  | 4.8  |
| Patupilone (EPO906, Epothilone B)                  | 15.3  | 3.9  | 0.1   | 2.4  |
| PF-573228                                          | 50.7  | 10.9 | 1.1   | 3.8  |
| Myricitrin                                         | 9.9   | 3.1  | -0.2  | 5.0  |
| PF-04929113 (SNX-5422)                             | 75.7  | 3.6  | 21.4  | 3.8  |
| Nocodazole                                         | 35.6  | 8.4  | 4.4   | 2.4  |
| Cabazitaxel                                        | 31.1  | 11.4 | 0.7   | 1.5  |
| Griseofulvin                                       | 28.9  | 1.1  | -6.4  | 2.5  |
| Y15                                                | 28.1  | 0.6  | 40.7  | 33.5 |
| Trimethyloctadecylammonium bromide                 | 25.3  | 16.5 | 12.1  | 1.7  |
| Cilengitide?trifluoroacetate                       | 34.1  | 2.1  | 4.2   | 2.2  |
| LGK-974                                            | 25.1  | 2.9  | 9.6   | 5.9  |
| NMS-E973                                           | 75.2  | 6.2  | 21.2  | 4.0  |
| FH535                                              | 39.2  | 11.4 | 5.6   | 3.8  |
| Afuresertib (GSK2110183)                           | 44.6  | 5.4  | -0.7  | 2.7  |
| KNK437                                             | 17.2  | 7.7  | 7.9   | 5.6  |
| Cyclo(RGDyK)                                       | 24.8  | 3.3  | 4.3   | 2.7  |
| GNF-7                                              | 89.7  | 1.2  | 93.8  | 2.3  |
| SKL2001                                            | -55.0 | 22.9 | -1.1  | 4.2  |
| Wnt-C59 (C59)                                      | -11.7 | 2.8  | 2.9   | 4.2  |
| TIC10 Analogue                                     | 7.5   | 2.3  | -1.2  | 6.5  |
| FRAX597                                            | 26.0  | 34.8 | -2.4  | 5.3  |
| VER-50589                                          | 72.4  | 13.6 | 19.2  | 3.0  |
| CK-636                                             | 1.9   | 1.9  | -5.3  | 0.9  |
| Monomethyl auristatin E (MMAE)                     | 53.0  | 12.8 | 21.3  | 1.5  |
| Cyclo (-RGDfK)                                     | 9.8   | 24.2 | -1.6  | 2.0  |
| Radotinib                                          | -8.9  | 6.2  | -3.9  | 1.7  |
| Leukadherin-1                                      | -0.6  | 31.1 | -0.8  | 3.9  |
| KPT-9274                                           | 23.1  | 15.7 | -1.2  | 4.2  |
| Perifosine (KRX-0401)                              | 29.7  | 1.7  | 5.3   | 5.7  |
| Miltefosine                                        | 22.9  | 0.1  | 11.1  | 9.2  |
| Fosbretabulin (Combretastatin A4 Phosphate (CA4P)) |       |      |       |      |
| Disodium                                           | 70.8  | 3.7  | 25.0  | 4.7  |
| RGD (Arg-Gly-Asp) Peptides                         | -14.0 | 12.2 | 9.4   | 5.3  |

|                                   |       |      |      |      |
|-----------------------------------|-------|------|------|------|
| ATN-161 (Ac-PHSCN-NH2)            | 1.7   | 8.2  | 15.0 | 10.5 |
| IWP-2                             | -22.2 | 34.1 | 2.3  | 5.5  |
| Defactinib (VS-6063, PF-04554878) | 80.3  | 21.9 | 84.7 | 11.3 |

Note: All compounds highlighted are FAK inhibitors selected as hit compounds because of their reduced cytotoxicity (Figure 6D & 6E). FAK: focal adhesion kinase.
